# Supplementary material for: Self-carbonized lamellar nano/micro hierarchical structure C/TiO2 and its Li-ion intercalation performance
Source: Royal Society of Chemistry journal article supplement (doi:10.1039/c2jm15400e), 2012-01-01
Supplement: c2jm15400e.pdf [file c2jm15400e.pdf]

Electronic Supplementary Information (ESI) available:

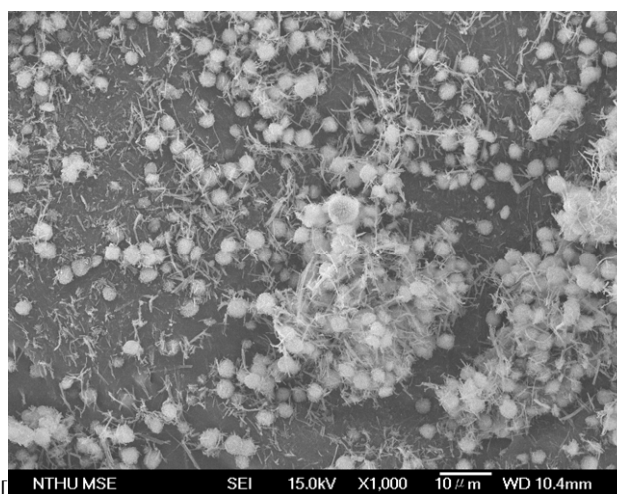

**Figure S1** The SEM image of the precipitate made by reacting titanium isopropoxide and acetic acid at 150 °C for 18 hours.

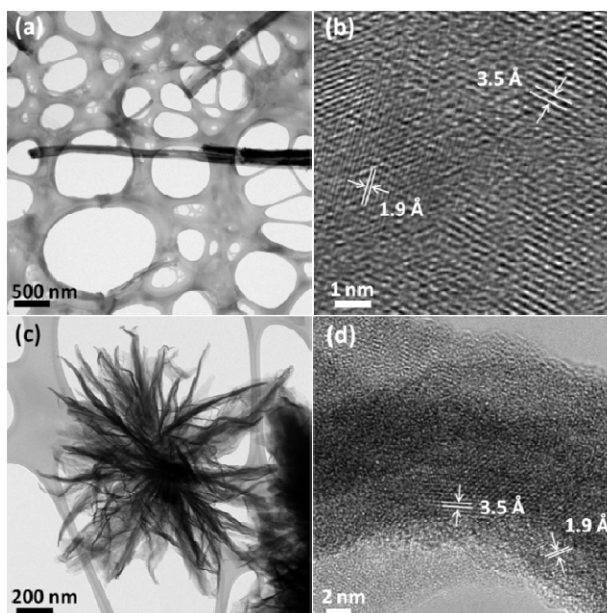

**Figure S2** (a), (b) TEM and HRTEM images of FT, respectively. (c), (d) TEM and HRTEM images of CT, respectively.

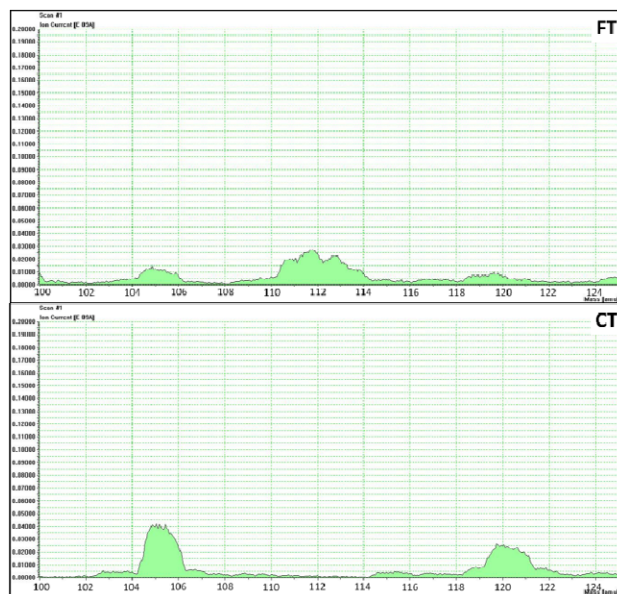

**Figure S3** 2-D TGA-MASS diagram of FT and CT regarding the ion current corresponding to  $m/z$  at 250 and 350 °C, respectively. ( $m/z = 100$  to 125)

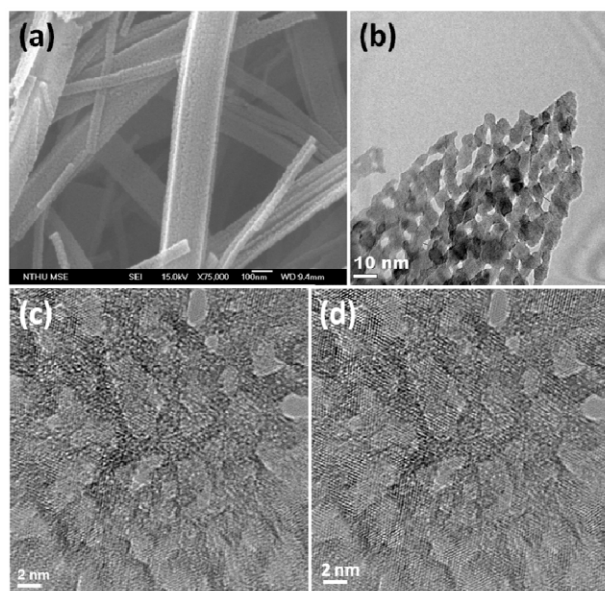

**Figure S4** (a) SEM image of FT500, and TEM images of (b) CT350, (c) sc-CT350 and (d) sc-CT500. All pictures show nanopores on the materials.

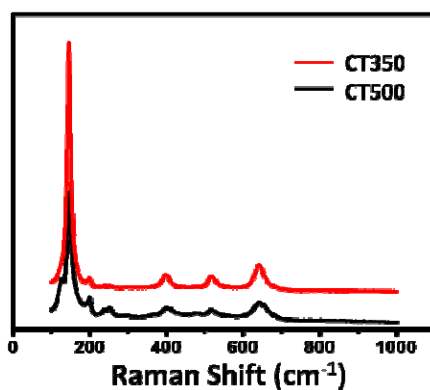

Figure S5 Raman spectra of CT350 (red line) and CT500 (black line)

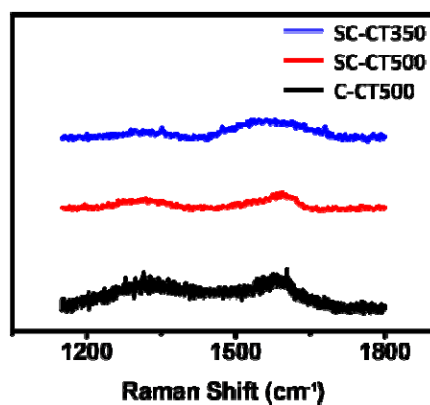

Figure S6 Raman spectra show D band and G band of C-CT500 (black line), SC-CT500 (red line) and SC-CT350 (blue line).

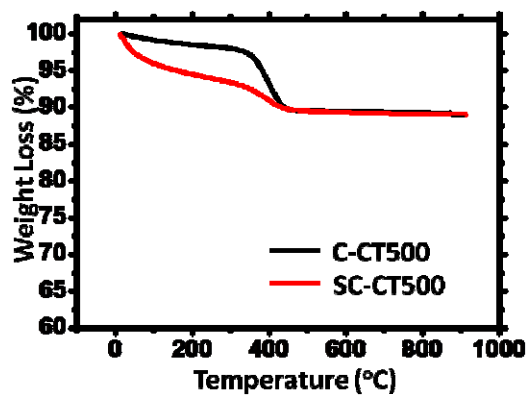

Figure S7 Thermogravimetric analysis (TGA) of C/TiO<sub>2</sub> composites with (black line) and without (red line) precursor.

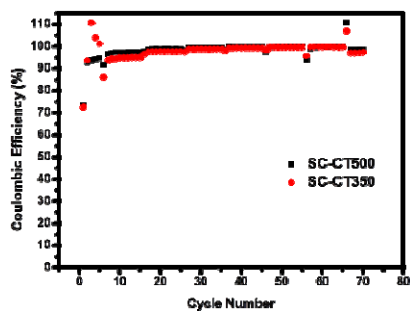

Figure S8 The coulombic efficiency of SC-CT350 and SC-CT500.

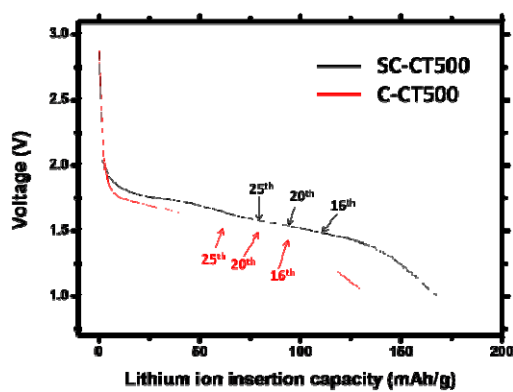

Figure S9 Discharging curves of SC-CT500 (black line) and C-CT500 (red line) in 16th, 20th and 25th cycle. The anode made by C-CT500 showed slight polarization but SC-CT500 didn't.

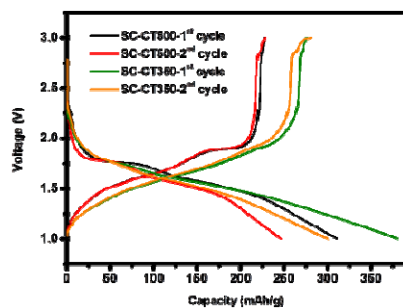

Figure S10 The charge/discharge curves of SC-CT350 and SC-CT500 in the first and the second cycles.
